# Supplementary material
Source: PubMed Central journal article supplement (PMC5540858)

# Electronic Supplementary Materials: Adult Sex Ratios & Partner Scarcity among Hunter-Gatherers: Implications for Dispersal Patterns and the Evolution of Human Sociality

Adrian V. Bell, Ryan Schacht, and Karen Kramer

Department of Anthropology, University of Utah  
270 S. 1400 E. Rm102, SLC, UT 84112

March 22, 2017

## Data format

The data derive from censuses collected by Greaves, Kramer and others in years 1986, 1988, 1990, 1993, 2005, 2006, 2007 (see main text). Using the following coding procedures we translated the data into an account of the year-by-year status of all individuals. We transcribed the data onto an  $N \times T$  matrix, where  $N$  is the total number of individuals included in the census over all years, and  $T$  is the number years included in the analysis. The elements / entries in the matrix give the status of individual  $i$  at time  $t$ , or  $s_{i,t}$ :

$$\begin{matrix} & y_1 & y_2 & \dots & y_T \\ \begin{matrix} 1 \\ 2 \\ \vdots \\ N \end{matrix} & \begin{pmatrix} s_{1,1} & s_{1,2} & \dots & s_{1,T} \\ s_{2,1} & s_{2,2} & \dots & s_{2,T} \\ \vdots & \vdots & \ddots & \vdots \\ s_{N,1} & s_{N,2} & \dots & s_{N,T} \end{pmatrix} \end{matrix}$$

The status  $s_{i,t}$  may indicate the presence or absence of an individual in the population at time  $t$ , and also may record death and migration. We use this matrix to estimate how death, aging-in, and migration affect adult sex ratios over time.

## Describing demographic forces

We can attribute the changes to a population's adult sex ratio from time  $t$  to  $t + 1$  in a straightforward manner. At the earliest time in our dataset, set at  $t = 1$ , we can sum up the number of male and females present. Let  $p_{i,t} = 0, 1$  indicate the presence of an adult male at time  $t$ , then

$$p_{i,t} = \begin{cases} 1 & \text{if } s_{i,t} \equiv h, 15 \leq a_{i,t} \leq 50, \text{ and } g_i \equiv 1 \\ 0 & \text{otherwise} \end{cases}$$

where  $a_{i,t}$  and  $g_i = 1, 2$  are the respective age and sex (1=male, 2=female) of individual  $i$  at time  $t$ . Similarly, for females,

$$q_{i,t} = \begin{cases} 1 & \text{if } s_{i,t} \equiv h, 15 \leq a_{i,t} \leq 40 \text{ and } g_i \equiv 2 \\ 0 & \text{otherwise} \end{cases}$$

We can then calculate the total number of males ( $m_t$ ) and females ( $f_t$ ) at time  $t$ :

$$m_t = \sum_{i=1}^N p_{i,t}, f_t = \sum_{i=1}^N q_{i,t}$$

Table 1 gives the number of males and females in Yaguri and Doro Aná at time  $t$ . From this data, the adult sex ratio ( $ASR$ ) at time  $t$  can then be calculated as  $ASR_t = m_t/(m_t + f_t)$ .

Table 1: Counts of males ages 16-45 and females 14-36 living in Yaguri (YA) and Doro Aná (DA)

| Year | males YA | females YA | males DA | females DA | males Combined | females Combined |
|------|----------|------------|----------|------------|----------------|------------------|
| 1983 | 8        | 7          | 8        | 9          | 16             | 16               |
| 1984 | 11       | 7          | 8        | 10         | 19             | 17               |
| 1985 | 12       | 6          | 8        | 9          | 20             | 15               |
| 1986 | 13       | 7          | 7        | 8          | 20             | 15               |
| 1987 | 11       | 7          | 10       | 10         | 21             | 17               |
| 1988 | 11       | 7          | 10       | 11         | 21             | 18               |
| 1989 | 10       | 7          | 11       | 10         | 21             | 17               |
| 1990 | 9        | 8          | 11       | 12         | 20             | 20               |
| 1991 | 8        | 9          | 12       | 11         | 20             | 20               |
| 1992 | 9        | 10         | 11       | 11         | 20             | 21               |
| 1993 | 9        | 9          | 11       | 12         | 20             | 21               |
| 1994 | 9        | 8          | 12       | 16         | 21             | 24               |
| 1995 | 9        | 9          | 14       | 16         | 23             | 25               |
| 1996 | 10       | 9          | 16       | 15         | 26             | 24               |
| 1997 | 10       | 9          | 16       | 15         | 26             | 24               |
| 1998 | 10       | 10         | 16       | 12         | 26             | 22               |
| 1999 | 12       | 13         | 15       | 12         | 27             | 25               |
| 2000 | 11       | 13         | 14       | 12         | 25             | 25               |
| 2001 | 13       | 14         | 15       | 12         | 28             | 26               |
| 2002 | 16       | 13         | 15       | 13         | 31             | 26               |
| 2003 | 16       | 14         | 14       | 12         | 30             | 26               |
| 2004 | 16       | 14         | 13       | 13         | 29             | 27               |
| 2005 | 17       | 15         | 15       | 14         | 32             | 29               |
| 2006 | 17       | 14         | 15       | 16         | 32             | 30               |
| 2007 | 16       | 15         | 16       | 18         | 32             | 33               |

We are also interested in the change of status for individual  $i$  and how that affects  $ASR_t$ . Let us define  $h_{i,t}$  as the migration status of a male individual  $i$  at time  $t$ .

$$h_{i,t} = \begin{cases} 0 & \text{if } s_{i,t} \equiv h, g_i \equiv 1 \text{ and } 15 \leq a_{i,t} \leq 50, \\ 1 & \text{if } s_{i,t} \equiv m, g_i \equiv 1 \text{ and } 15 \leq a_{i,t} \leq 50, \\ -1 & \text{if } s_{i,t} \equiv e, g_i \equiv 1 \text{ and } 15 \leq a_{i,t} \leq 50, \end{cases}$$

Thus the net migration change of males at time  $t$  becomes,

$$H_t = \sum_{i=1}^N h_{i,t}$$

In a similar manner we can calculate the change in  $ASR_t$  due to death ( $D_t$ ) and aging-in ( $B_t$ ) for both males and females. Using values of  $H_t$ ,  $D_t$ , and  $B_t$ , we can calculate and compare the effect of each of these forces, as we see in Figure 1 and in the main text. We see aging-in effects figuring in more prominently, with net migration and death both as next major factors.

ESM Fig. 1: Cumulative absolute effect of net migration, adult death, and aging-in on ASR each year among two populations of Savanna Pumé.

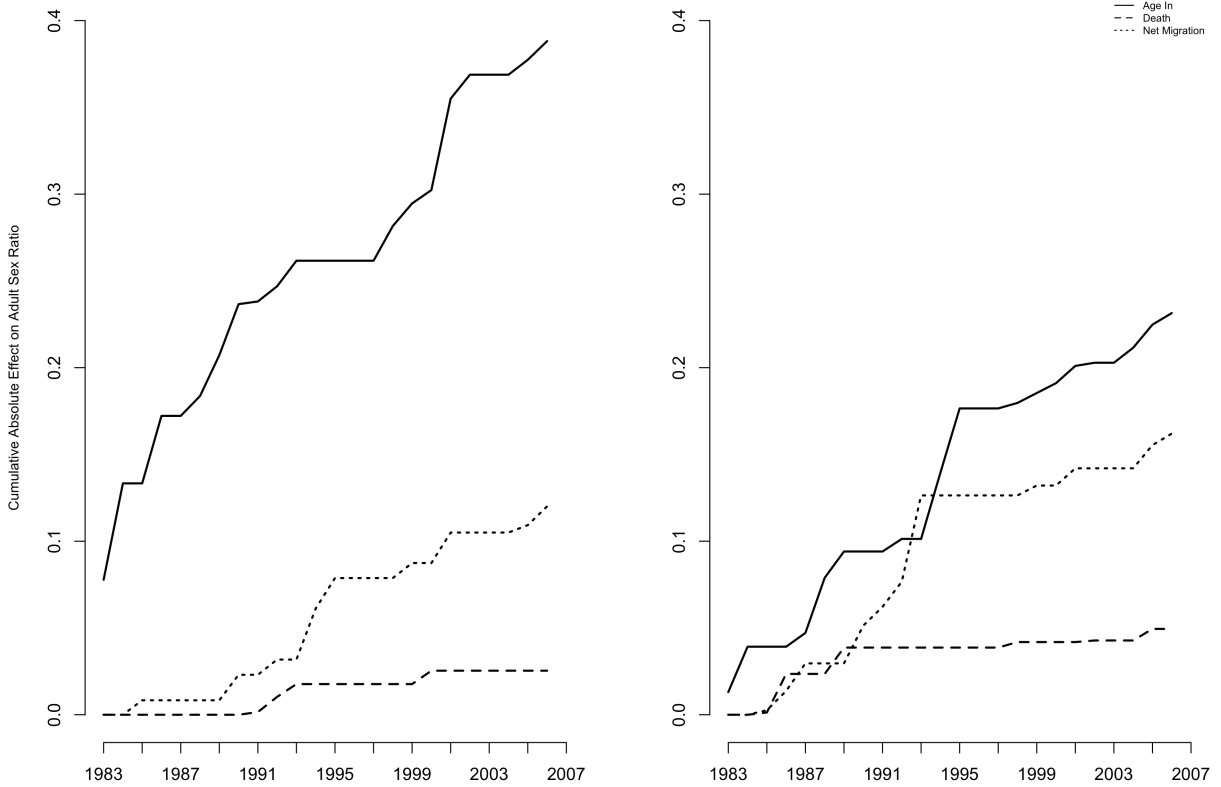

Supplement: rstb20160316supp1.pdf [file rstb20160316supp1.pdf]
